# Supplementary material
Source: PubMed Central journal article supplement (PMC395781)

Additional data file 10.

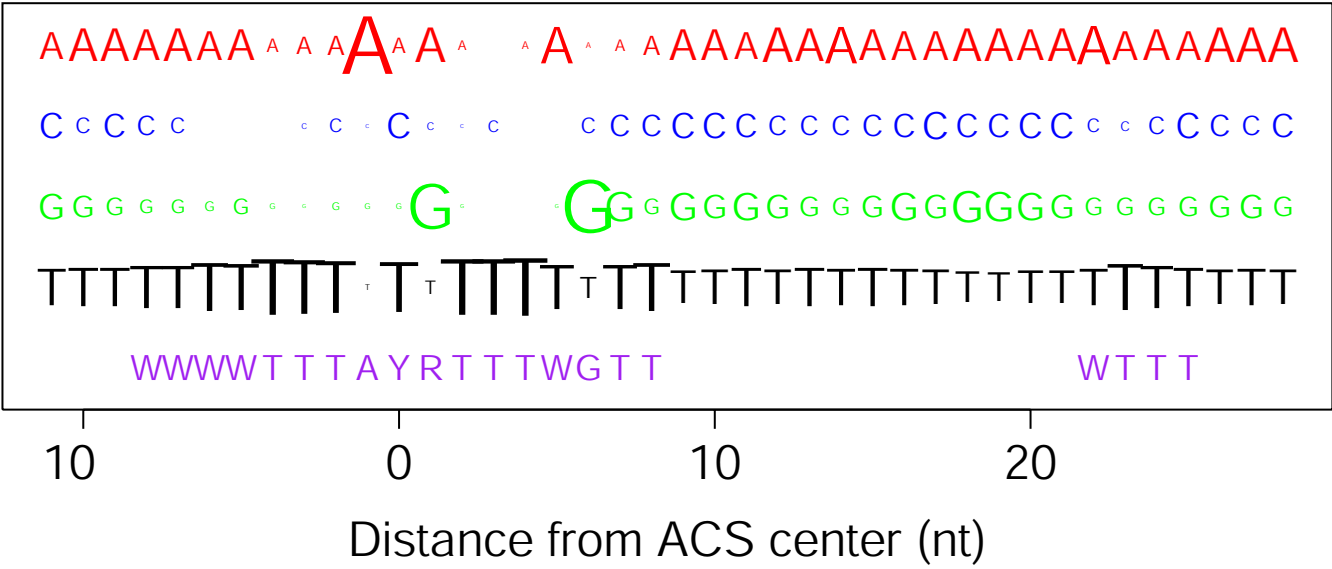

Supplement: gb-2004-5-4-r22-s10.pdf [file gb-2004-5-4-r22-s10.pdf]
